# Supplementary material for: Zero-tolerance biosecurity protects high-conservation-value island nature reserve
Source: PubMed Central journal article supplement (PMC5428405; doi:10.1038/s41598-017-00450-y), 2017-04-10
Supplement: 41598_2017_450_MOESM1_ESM.pdf [file 41598_2017_450_MOESM1_ESM.pdf]

# Supplementary Materials for

## Zero-tolerance biosecurity protects high-conservation-value island nature reserve

John K. Scott, Simon J. McKirdy, Johann van der Merwe, Roy Green, Andrew A. Burbidge, Greg Pickles, Darryl Hardie, Keith Morris, Peter Kendrick, Melissa L. Thomas, Kristin L. Horton, Simon M. O'Connor, Justin Downs, Richard Stoklosa, Russell Lagdon, Barbara Marks, Malcolm Nairn, Kerrie Mengersen

Correspondence to: [S.McKirdy@murdoch.edu.au](mailto:S.McKirdy@murdoch.edu.au)

### Table S1. Quantities of material sent to Barrow Island (BWI) between September 2009 and September 2015 for oilfield operations and construction of the LNG plant, and measurement units of the biosecurity system (QMS).

| Category of material               | Definition                                                                                                                                | Amount  | Units  |
|------------------------------------|-------------------------------------------------------------------------------------------------------------------------------------------|---------|--------|
| Twenty foot equivalent units (TEU) | TEU is used to measure a ship's cargo carrying capacity. The dimensions of one TEU are equal to that of a standard 20' shipping container | 205,298 | Number |
| Voyages (domestic)                 | Voyages of vessels from Australian ports                                                                                                  | 4,403   | Number |
| Voyages (international)            | Voyages of vessels from non-Australian ports                                                                                              | 331     | Number |
| Containers                         | A shipping container is a container with strength suitable to withstand shipment, storage, and handling                                   | 63,927  | Number |
| Flat racks                         | Open-topped, open-sided units that fit into existing below-deck container cell guides and provide a capability                            | 26,048  | Number |

|                                  |                                                                                                                                                                           |           |        |
|----------------------------------|---------------------------------------------------------------------------------------------------------------------------------------------------------------------------|-----------|--------|
|                                  | for container ships to carry oversized cargo and wheeled and tracked vehicles                                                                                             |           |        |
| Freight                          | All materials transported to BWI (excluding rock, sand and aggregate)                                                                                                     | 8,979,396 | Tonnes |
| Freight (rock, sand, aggregate)  | All rock, sand and aggregate transported to BWI                                                                                                                           | 3,182,642 | Tonnes |
| Flights                          | Aircraft movements from Perth and Karratha to BWI                                                                                                                         | 12,332    | Number |
| Air passengers                   | Passenger transported by air to BWI                                                                                                                                       | 693,781   | Number |
| Material management ticket (MMT) | Document system to track the movement of materials within the supply chain. Each MMT might include one to several containers or similar groupings for inspection purposes | 134,265   | Number |
| Biosecurity inspections          | Inspection of materials and personnel by biosecurity inspectors                                                                                                           | 1,472,379 | Hours  |

15

16

17 **Table S2. Pathways assessed to manage the likelihood of introductions**

| Pathway                         | Description                                                                                                                                                                                                                                     |
|---------------------------------|-------------------------------------------------------------------------------------------------------------------------------------------------------------------------------------------------------------------------------------------------|
| Personnel and luggage           | All air crew, cabin staff, and passengers that travel to BWI and their luggage, tools and toolboxes.                                                                                                                                            |
| Skid, steel and loose equipment | Items such as; gas turbines, generators, starter/helper motors, compressors, transformers, control panels, electric motors, sheet metal, and fabricated steel components                                                                        |
| Modules                         | Large pre-fabricated LNG plant components constructed in international construction yards and shipped to BWI                                                                                                                                    |
| Food and perishables            | All food and material associated with food consumption sent to BWI                                                                                                                                                                              |
| Containerised goods             | Items that were inspected and packed into containers/crates for transportation                                                                                                                                                                  |
| Sand and aggregate              | Comprises road base, backfill, sand and aggregate                                                                                                                                                                                               |
| Special and sensitive equipment | Items that have been made biosecurity compliant utilising specific barriers. These items cannot be washed, cleaned or chemically treated in a conventional sense, and due to its nature, composition or intended use, requires special handling |

|                            |                                                                                                                                                                                        |
|----------------------------|----------------------------------------------------------------------------------------------------------------------------------------------------------------------------------------|
| Plant and mobile equipment | Includes tracked and wheeled vehicles, earthmoving machinery, welders, compressors, work platforms, cranes, contractor tools and trailers on which equipment may be transported to BWI |
| Aircraft                   | Includes both passenger and freight aircraft                                                                                                                                           |
| Airfreight                 | All freight transported by aircraft                                                                                                                                                    |
| Helicopter transfers       | Transport of personnel from offshore facilities and neighbouring islands to BWI                                                                                                        |
| Domestic vessel            | All vessels arriving at BWI and its neighbouring waters from Australian ports                                                                                                          |
| Direct shipment            | All vessels arriving at BWI and its neighbouring waters from international ports                                                                                                       |

18

19

20 **Table S3. Number of false positives.**

| <b>Type of false positive</b>                                                                                                                                       | <b>Number</b> |
|---------------------------------------------------------------------------------------------------------------------------------------------------------------------|---------------|
| Species indigenous to BWI                                                                                                                                           | 2,143         |
| NIS already established on BWI                                                                                                                                      | 405           |
| Non-viable invertebrate NIS*                                                                                                                                        | 798           |
| Not applicable (includes procedural deviations, non-viable plant material,<br>soil and organic matter)                                                              | 201           |
| Vagrant species (i.e. that move naturally between the mainland and the<br>island)                                                                                   | 104           |
| Uncertain (biological material that cannot be identified to a species level.<br>Some specimens were too immature or were too damaged for further<br>identification) | 776           |
| <b>Total</b>                                                                                                                                                        | <b>4,427</b>  |

21 \*specimen was dead or only body parts of a specimen were detected.

22

23

24 **Table S4. The 20 most abundant species detected at the border and their frequency of detection over the six years.**

| Species name               | Family     | Type of organism | 2009-2010 | 2011 | 2012 | 2013 | 2014 | 2015 | Total |
|----------------------------|------------|------------------|-----------|------|------|------|------|------|-------|
| <i>Typha</i> sp.           | Typhaceae  | Plant            | 161       | 97   | 152  | 69   | 51   | 15   | 545   |
| <i>Cortaderia</i> sp.      | Poaceae    | Plant            | 83        | 28   | 9    | 3    | 2    | 1    | 126   |
| <i>Sonchus</i> sp.         | Asteraceae | Plant            | 29        | 17   | 12   | 43   | 11   | 1    | 113   |
| <i>Conyza</i> sp.          | Asteraceae | Plant            | 19        | 3    | 7    | 11   | 1    | 1    | 42    |
| <i>Hypochaeris</i> sp.     | Asteraceae | Plant            | 6         | 12   | 8    | 10   | 5    |      | 41    |
| <i>Senecio</i> sp.         | Asteraceae | Plant            | 2         | 1    | 5    | 7    |      | 2    | 17    |
| <i>Hasarius adansoni</i>   | Salticidae | Spider           |           | 14   | 1    | 1    |      |      | 16    |
| <i>Theba pisana</i>        | Helicidae  | Mollusc          | 1         | 1    | 6    | 2    | 2    | 1    | 13    |
| <i>Cenchrus</i> sp.        | Poaceae    | Plant            | 1         | 6    | 5    |      | 1    |      | 13    |
| <i>Prietocella barbara</i> | Helicidae  | Mollusc          |           | 1    | 5    | 3    | 2    |      | 11    |

|                          |               |           |     |     |     |     |    |    |      |
|--------------------------|---------------|-----------|-----|-----|-----|-----|----|----|------|
| <i>Hemidactylus</i>      |               |           | 1   | 6   | 4   |     |    |    | 11   |
| <i>frenatus</i>          | Gekkonidae    | Gecko     |     |     |     |     |    |    |      |
| <i>Saccharum</i> sp.     | Poaceae       | Plant     |     |     |     | 3   | 7  | 1  | 11   |
| <i>Lactuca</i> sp.       | Asteraceae    | Plant     |     |     | 1   | 8   | 1  |    | 10   |
| <i>Malus domestica</i>   | Rosaceae      | Plant     |     | 4   | 4   | 1   |    | 1  | 10   |
| <i>Oryzaephilus</i> sp.  | Silvanidae    | Beetle    |     | 1   |     | 3   | 2  | 3  | 9    |
| <i>Pennisetum</i> sp.    | Poaceae       | Plant     | 1   |     | 4   | 4   |    |    | 9    |
| <i>Sitophilus oryzae</i> | Curculionidae | Beetle    |     |     | 1   | 2   | 1  | 4  | 8    |
| <i>Drymaplaneta</i>      |               | Cockroach |     | 1   | 1   | 3   | 1  | 1  | 7    |
| <i>semivittata</i>       | Blattellidae  |           |     |     |     |     |    |    |      |
| <i>Calomyrmex</i> sp.    | Formicidae    | Ant       |     |     |     | 7   |    |    | 7    |
| <i>Tribolium</i> sp.     | Tenebrionidae | Beetle    | 2   | 2   | 2   |     |    | 1  | 7    |
| Total                    |               |           | 306 | 194 | 227 | 180 | 87 | 32 | 1026 |

---

|            |    |    |    |    |    |    |    |
|------------|----|----|----|----|----|----|----|
| Cumulative | 11 | 16 | 18 | 20 | 20 | 20 | 20 |
| species    |    |    |    |    |    |    |    |

---

25 Notes: *Rattus* sp. Scats were also detected 6 times without any evidence of recent rat presence.



26

27 **Table S5. Seasonal differences in the number of individuals and type of organism detected presented on a quarterly basis for**  
 28 **the period 2010 – 2014.**

| <b>Year</b> | <b>Type of organism detected</b> | <b>Quarter 1<br/>(Jan. – March)</b> | <b>Quarter 2<br/>(April – June)</b> | <b>Quarter 3<br/>(July – Sept.)</b> | <b>Quarter 4<br/>(Oct. – Dec.)</b> |
|-------------|----------------------------------|-------------------------------------|-------------------------------------|-------------------------------------|------------------------------------|
| 2010        | Seed                             | 9                                   | 63                                  | 156                                 | 176                                |
|             | Invertebrate                     | 28                                  | 47                                  | 20                                  | 26                                 |
|             | Vertebrate                       | 1                                   | 3                                   | 2                                   | 3                                  |
|             | Plant material*                  | 1                                   | 14                                  | 11                                  | 3                                  |
| 2011        | Seed                             | 59                                  | 80                                  | 53                                  | 84                                 |
|             | Invertebrate                     | 82                                  | 227                                 | 145                                 | 315                                |
|             | Vertebrate                       | 1                                   | 6                                   | 8                                   | 16                                 |
|             | Plant material                   | 2                                   | 2                                   | 5                                   | 11                                 |
| 2012        | Seed                             | 29                                  | 177                                 | 66                                  | 35                                 |
|             | Invertebrate                     | 496                                 | 472                                 | 292                                 | 441                                |

|      |                |     |     |     |     |
|------|----------------|-----|-----|-----|-----|
|      | Vertebrate     | 13  | 7   | 12  | 12  |
|      | Plant material | 23  | 12  | 29  | 27  |
| 2013 | Seed           | 31  | 108 | 26  | 52  |
|      | Invertebrate   | 543 | 248 | 180 | 144 |
|      | Vertebrate     | 26  | 13  | 9   | 17  |
|      | Plant material | 31  | 98  | 44  | 30  |
| 2014 | Seed           | 31  | 38  | 27  | 33  |
|      | Invertebrate   | 282 | 134 | 90  | 88  |
|      | Vertebrate     | 12  | 10  | 2   | 4   |
|      | Plant material | 32  | 50  | 15  | 14  |

29

---

\* excluding seed

30

31 **Table S6. The 17 most abundant Non-Indigenous Species (occurrence >1) detected post-border and their frequency over the**  
 32 **six years.**

| Species name                  | Family       | Type of organism | 2009-2010 | 2011 | 2012 | 2013 | 2014 | 2015 | Total |
|-------------------------------|--------------|------------------|-----------|------|------|------|------|------|-------|
| <i>Sonchus</i> sp.            | Asteraceae   | Plant            | 1         | 9    | 4    | 2    |      | 6    | 22    |
| <i>Ommatoiulus moreletii</i>  | Julidae      | Millipede        | 1         | 2    | 2    | 3    | 3    | 2    | 13    |
| <i>Blattella germanica</i>    | Blattellidae | Cockroach        |           |      | 3    | 8    |      |      | 11    |
| <i>Drymaplaneta semivitta</i> | Blattidae    | Cockroach        |           | 1    | 1    | 3    | 2    |      | 7     |
| <i>Medicago polymorpha</i>    | Fabaceae     | Plant            |           | 1    |      | 1    | 2    | 3    | 7     |
| <i>Badumna</i> sp.            | Desidae      | Spider           |           | 1    | 1    | 2    | 1    | 1    | 6     |
| <i>Arctotheca calendula</i>   | Asteraceae   | Plant            |           |      | 1    | 2    | 1    | 1    | 5     |
| <i>Cenchrus</i> sp.           | Poaceae      | Plant            |           | 1    | 4    |      |      |      | 5     |
| <i>Cimex lectularius</i>      | Cimicidae    | Insect           |           |      |      | 4    |      |      | 4     |
| <i>Conyza</i> sp.             | Asteraceae   | Plant            | 1         |      | 3    |      |      |      | 4     |
| <i>Leontodon saxatilis</i>    | Asteraceae   | Plant            |           | 1    |      |      |      | 2    | 3     |

|                              |              |           |   |    |    |    |    |    |     |
|------------------------------|--------------|-----------|---|----|----|----|----|----|-----|
| <i>Cornu asperum</i>         | Helicidae    | Mollusc   |   | 1  | 1  | 1  |    | 3  |     |
| <i>Litoria rubella</i>       | Hylidae      | Frog      | 1 | 2  |    |    |    | 3  |     |
| <i>Supella longipalpa</i>    | Blattellidae | Cockroach |   |    | 1  | 2  |    | 3  |     |
| <i>Epiphyas postvittana</i>  | Tortricidae  | Moth      | 2 |    |    |    |    | 2  |     |
| <i>Lactuca</i> sp.           | Asteraceae   | Plant     |   |    |    |    | 2  | 2  |     |
| <i>Christinus marmoratus</i> | Gekkonidae   | Gecko     | 1 |    | 1  |    |    | 2  |     |
| <b>Total</b>                 |              |           | 4 | 19 | 23 | 27 | 12 | 17 | 102 |
| <b>Cumulative species</b>    |              |           | 4 | 10 | 14 | 16 | 16 | 17 | 17  |

33

34
